# Supplementary material
Source: PubMed Central journal article supplement (PMC8491685)
Supplement: supplementary_materials_revision_cerebral_cortex_clean_bhab156.pdf [file supplementary_materials_revision_cerebral_cortex_clean_bhab156.pdf]

## Methods

### *Replication of Moderation Results*

To replicate our main findings that brain dynamic metrics among 9 regions of interest (ROI) comprising three neurocognitive networks (midcingulo-insular network, M-CIN; medial frontoparietal network, M-FPN; and lateral frontoparietal network, L-FPN) moderated Age<sup>2</sup> and cognitive flexibility, we re-ran our moderation analyses using ROIs from the Schaefer parcellation (Schaefer et al. 2018). First we extracted 190 ROIs comprising the M-CIN, M-FPN, and L-FPN (**Supplementary Table 2**), and then extracted 400 ROIs comprising the whole-brain (**Supplementary Table 3**). The same pre- and post-processing procedures were followed as described in the main manuscript.

### *Statistical Analyses*

The same statistical procedures were followed as described in the main manuscript, however, we only conducted statistical analyses for the moderation results. Using the 190 ROIs comprising the M-CIN, M-FPN, and L-FPN, we recomputed analyses on brain dynamic metrics and co-activation patterns equivalent to the ones that survived correction in our original analyses (M-FPN/-L-FPN co-activation pattern (CAP) dwell time and transitions). Using the 400 ROIs comprising the whole-brain, all original moderation analyses were recomputed.

## Results

### *Co-activation pattern analysis*

Results from the CAP analysis among the 190 Schaefer ROIs comprising the M-CIN, L-FPN, and M-FPN are presented in **Supplementary Figure 4** and the ROIs are listed in **Supplementary Table 2**. CAP 1 was characterized by co-activation among a few L-FPN and M-FPN nodes. CAP 2 was characterized by co-activation primarily among the L-FPN nodes and

a few M-CIN nodes. CAP 3 was characterized by co-activation among the M-FPN nodes. CAP 4 was characterized by co-activation primarily among the M-FPN and nodes of the L-FPN. CAP 5 was characterized by co-activation among the M-CIN.

Results from the CAP analysis among the 400 Schaefer ROIs comprising the whole-brain are presented in **Supplementary Figure 5** and the ROIs are listed in **Supplementary Table 3**.

CAP 1 was characterized by co-activation among the M-FPN, M-CIN, and somatomotor nodes.

CAP 2 was characterized by co-activation primarily among the L-FPN, M-FPN, limbic and

somatomotor nodes. CAP 3 was characterized by co-activation among the dorsal attention

network (DAN), visual, and a few M-FPN nodes. CAP 4 was characterized by co-activation

primarily among the DAN and visual nodes. CAP 5 was characterized by co-activation among

the L-FPN, M-FPN, M-CIN, and somatomotor nodes.

#### *Interactions between age and brain dynamics predicting cognitive flexibility*

The original results were replicated using the 190 Schaefer ROIs (M-CIN, M-FPN, L-FPN). The dwell time of CAP 4 was chosen in the analysis because in comparison to the other CAPs, it visually had the strongest co-activation pattern among the M-FPN with nodes in the L-FPN as this was similar to the M-FPN/-L-FPN CAP in the original manuscript. We found that the dwell time of CAP 4 moderated the relationship between the quadratic effect of age and cognitive flexibility (trail making test (TMT) switching completion time),  $b = < 0.001$ ,  $SE = < 0.001$ ,  $p = .016$ . The number of brain state transitions also moderated the relationship between the quadratic effect of age and cognitive flexibility for TMT switching completion time,  $b = < 0.001$ ,  $SE = < 0.001$ ,  $p = .048$  (**Supplementary Figure 6**). Overall, our results using more ROIs underlying the M-CIN, M-FPN, and L-FPN replicated our main findings in the original manuscript.

Results from the 400 Schaefer ROIs comprising the whole-brain extended our original results by revealing the same key networks moderate age and cognitive flexibility, however, linear age interactions are seen when more brain regions are involved. After Bonferroni correction ( $.05/11 = .005$ ), three significant results remained. The frequency of CAP 2, characterized by co-activation among the L-FPN, M-FPN, limbic and somatomotor nodes, moderated the relationship between the linear effect of age and cognitive flexibility (Verbal Fluency (VF) switching total correct),  $b = -0.01$ ,  $SE = 0.01$ ,  $p = .003$ . The frequency of CAP 3, characterized by co-activation among the DAN, visual, and a few M-FPN nodes, moderated the relationship between the linear effect of age and cognitive flexibility (Color-Word Interference Test (CWIT) switching completion time),  $b = -0.16$ ,  $SE = 0.05$ ,  $p = .002$ . Lastly, the frequency of CAP 5, characterized by co-activation among the L-FPN, M-FPN, M-CIN, and somatomotor nodes, moderated the relationship between the linear effect of age and cognitive flexibility (CWIT switching completion time),  $b = -0.18$ ,  $SE = 0.05$ ,  $p = < .001$  (**Supplementary Figure 7**). Overall, the results from the whole-brain analysis extend our original findings by revealing dynamic co-activations among the whole-brain, primarily consisting of the M-FPN, L-FPN, and M-CIN, moderate the relationship between age and cognitive flexibility.

### **Supplementary Figure 1**

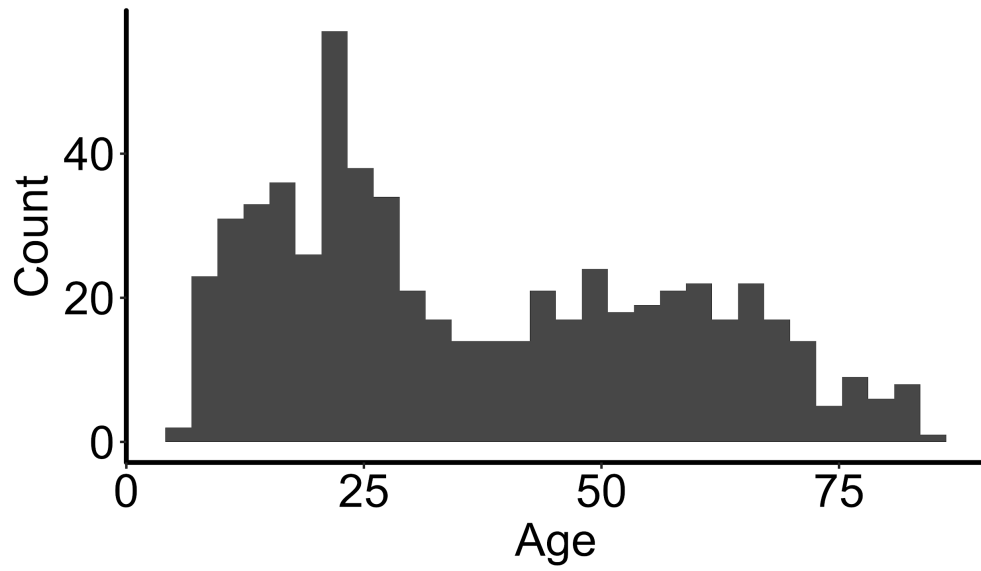

Supplementary Figure 1. Age histogram of the sample (N = 601)

Supplementary Figure 2

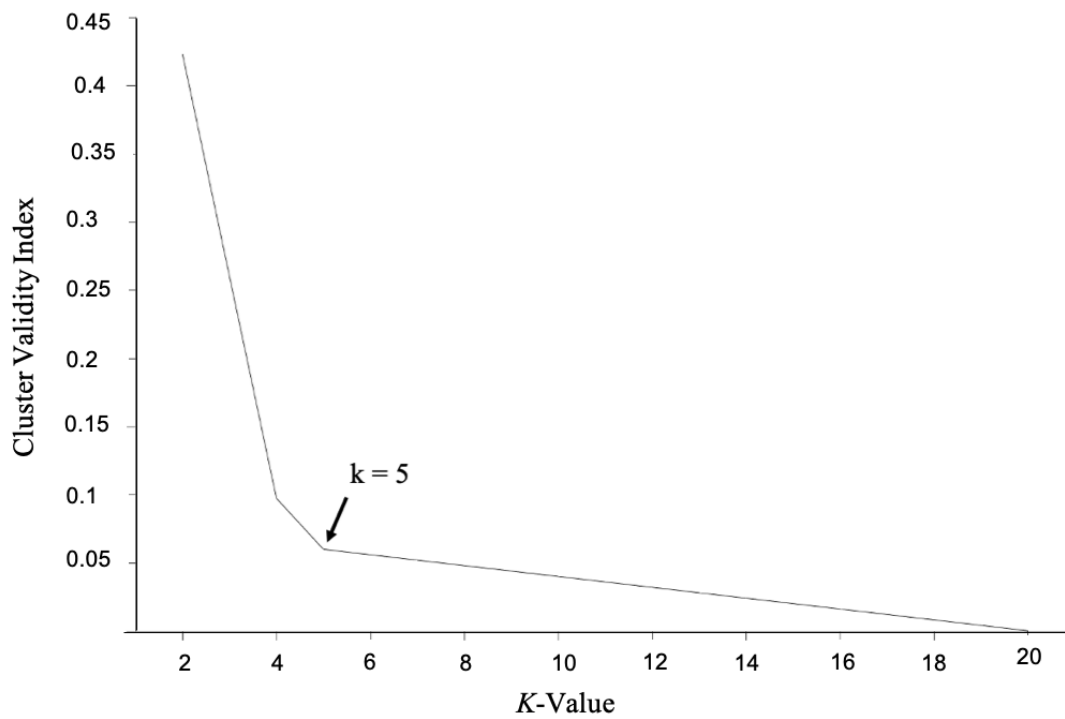

Supplementary Figure 2. Elbow Criterion

The elbow criterion identifies  $k = 5$  clusters.

### Supplementary Figure 3

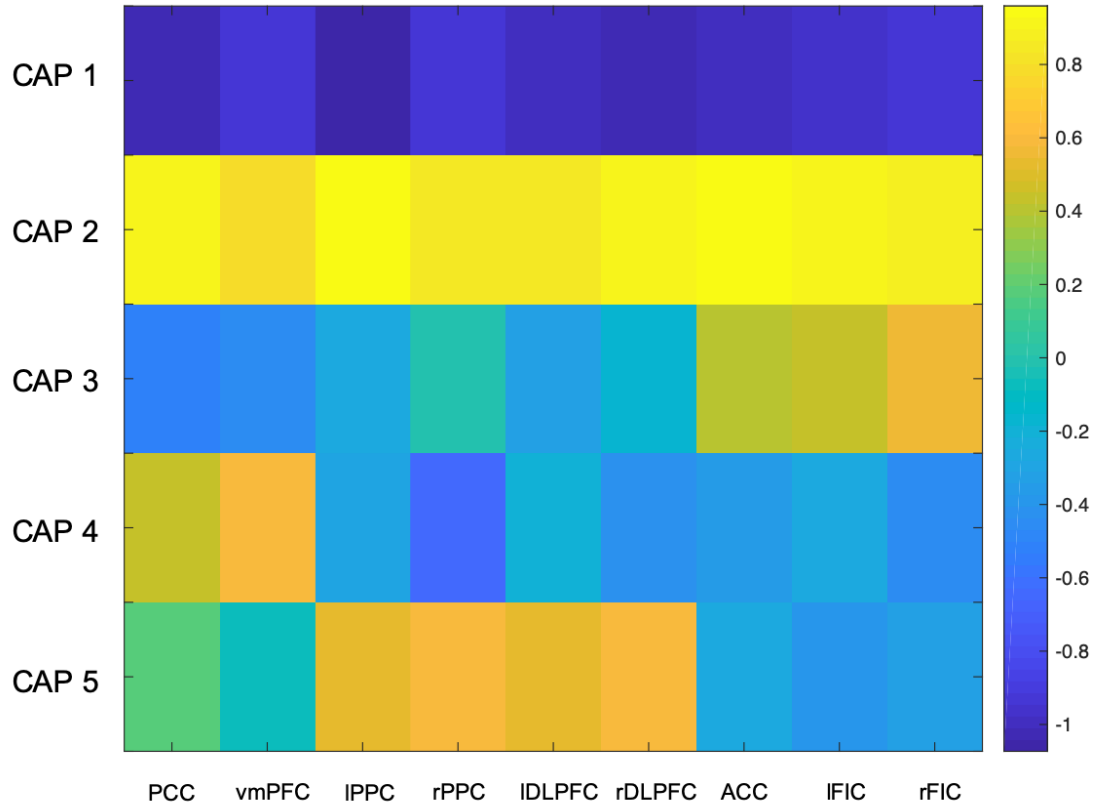

### Supplementary Figure 3. Analysis without global signal regression

Note: PCC, posterior cingulate cortex; vmPFC, ventromedial prefrontal cortex; IPPC, left posterior parietal cortex; rPPC, right posterior parietal cortex; IDLPFC, left dorsolateral prefrontal cortex; rDLPFC, right dorsolateral prefrontal cortex; ACC, anterior cingulate cortex; IFIC, left fronto-insular cortex; rFIC, right fronto-insular cortex.

### Supplementary Figure 4

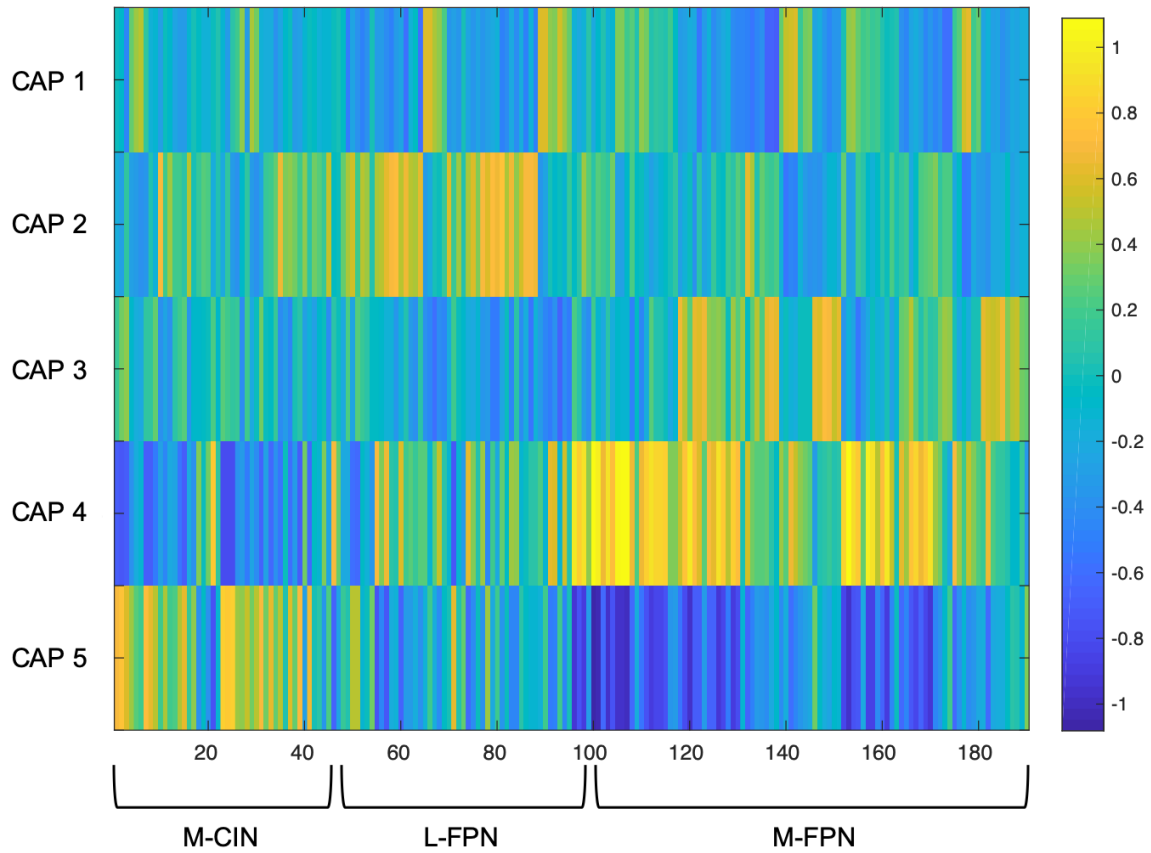

**Supplementary Figure 4. Co-activation Pattern Analysis (CAP) using Schaefer M-CIN, L-FPN, and M-FPN ROIs**

Graphical brain representation of each CAP as demonstrated by the 190 region of interests (ROIs) comprising the M-CIN, L-FPN, and M-FPN. Note: M-CIN, midcingulo-insular network; L-FPN, lateral frontoparietal network; and M-FPN, medial frontoparietal network.

**Supplementary Figure 5**

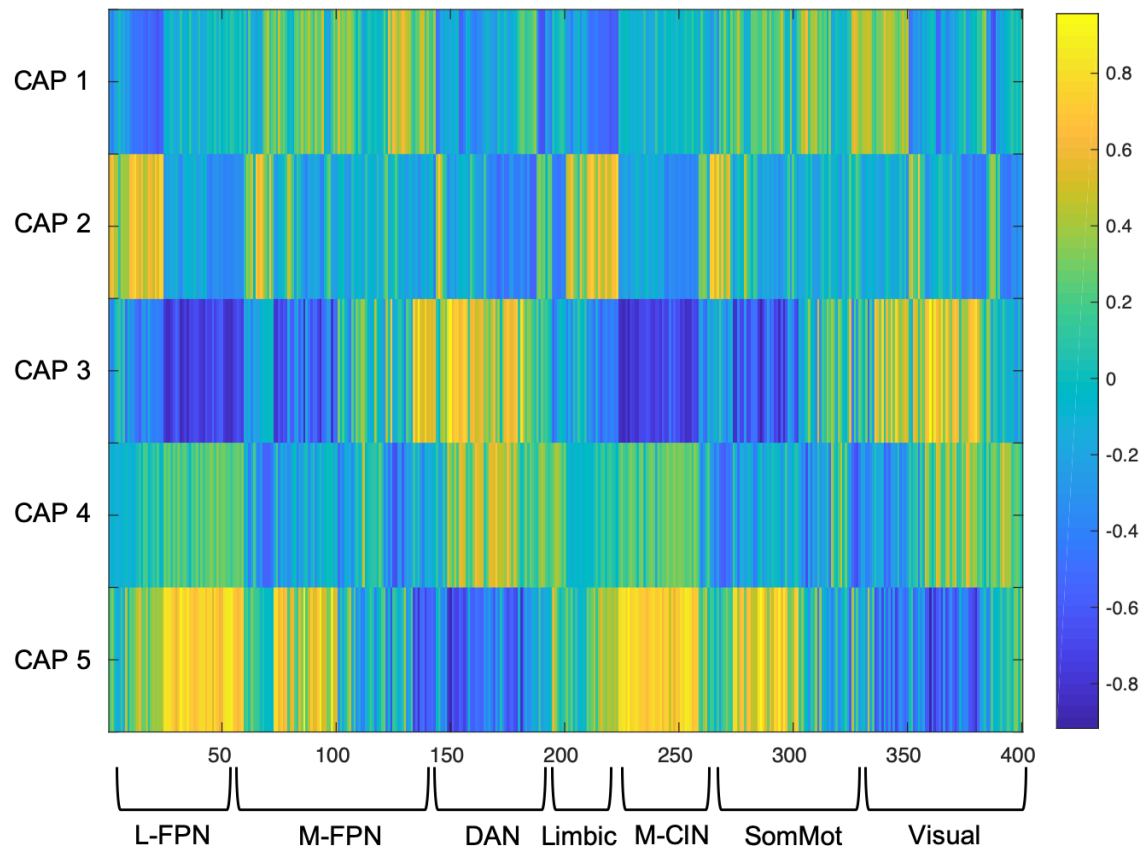

**Supplementary Figure 5. Co-activation Pattern Analysis (CAP) using Schaefer whole-brain ROIs**

Graphical brain representation of each CAP as demonstrated by the 190 region of interests (ROIs) comprising the M-CIN, L-FPN, and M-FPN. Note: L-FPN, lateral frontoparietal network; M-FPN, medial frontoparietal network; DAN, dorsal attention network; M-CIN, midcingulo-insular network; and SomMot, somatomotor.

**Supplementary Figure 6**

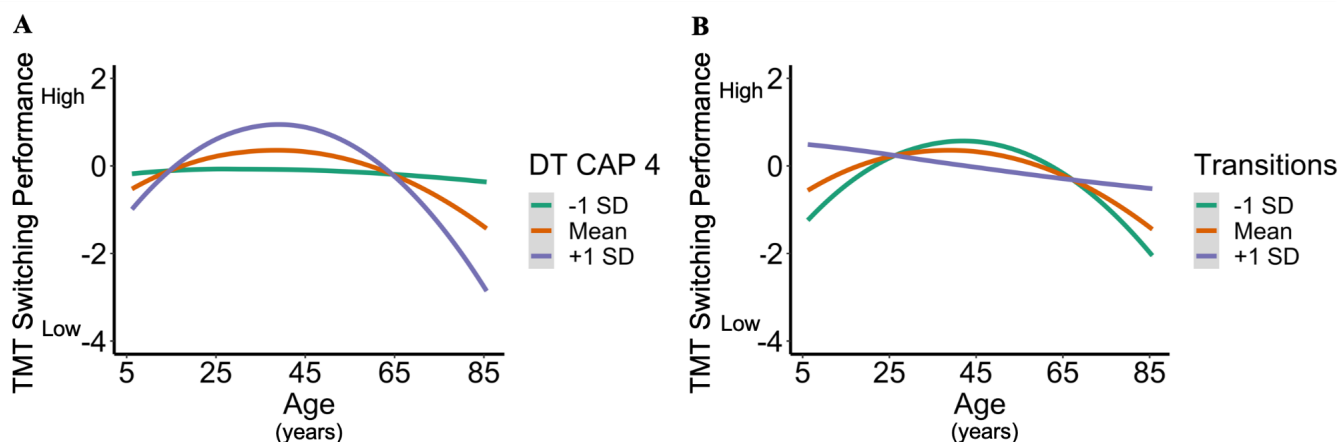

### Supplementary Figure 6. Schaefer M-FPN, L-FPN, and M-CIN moderation results

The interactions presented in A and B were between  $\text{Age}^2$  and the brain dynamic metrics for co-activation pattern (CAP) 4 and brain state transitions, however, they are presented across age for visual purposes. Additionally, the y-axes were reversed and standardized so better cognitive flexibility performance is at higher ends (the top) and poorer cognitive flexibility performance is at lower ends (the bottom) of the y-axes. (A) demonstrates the CAP 4 dwell time moderated the relationship between  $\text{Age}^2$  and the trail making test (TMT) Switching condition (total time to complete the task) as represented by the simple slopes of CAP 4 dwell time (-1 SD, mean, and +1 SD). CAP 4 is characterized by co-activation among the L-FPN (executive control) and M-FPN (default). Children and older adults who spent a longer time in CAP 4 had poorer cognitive flexibility, whereas younger adults had optimal cognitive flexibility regardless of their CAP 5 brain dynamics. (B) demonstrates the number of transitions moderated the relationship between  $\text{Age}^2$  and the TMT Switching condition (total time to complete the task) as represented by the simple slopes. Children and older adults who had fewer brain state transitions had poorer cognitive flexibility, whereas younger adults had optimal cognitive flexibility regardless of their brain state transitions.



## Supplementary Figure 7

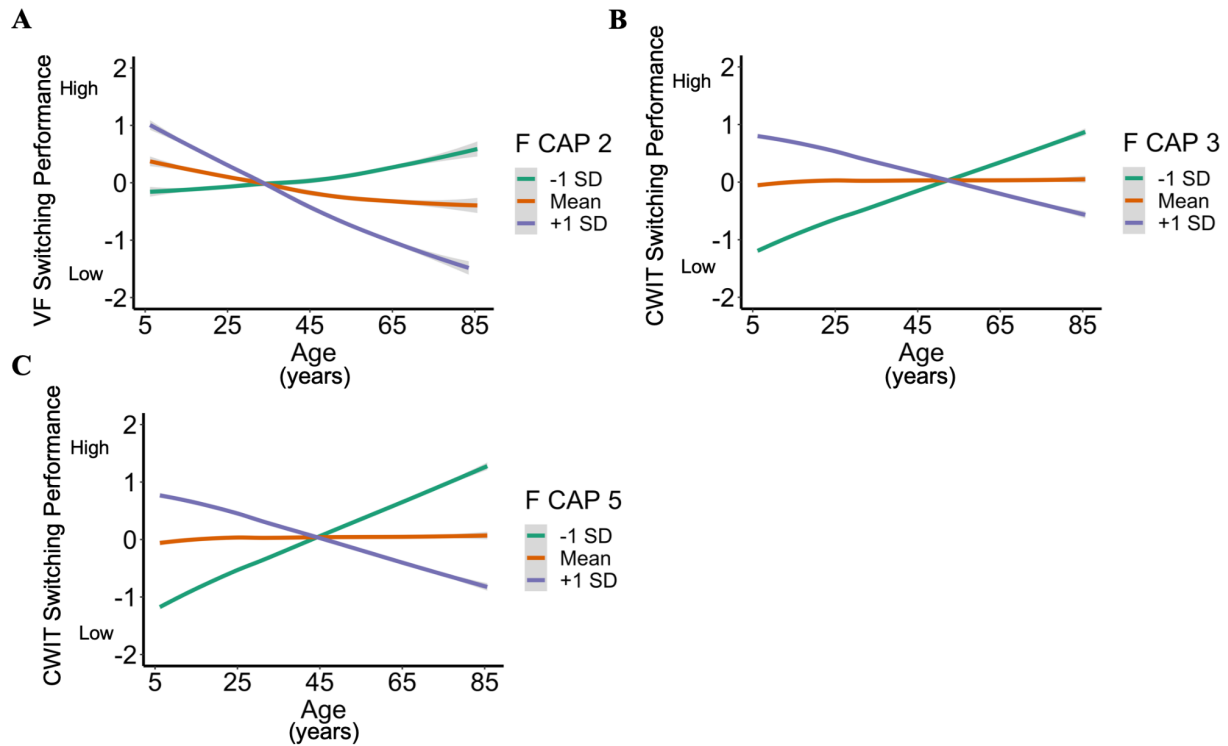

### Supplementary Figure 7. Schaefer whole-brain moderation results

The interactions presented in A, B, and C were between Age and the brain dynamic metrics for co-activation patterns (CAPs) 2, 3, and 5. Additionally, the y-axes were reversed and standardized so better cognitive flexibility performance is at higher ends (the top) and poorer cognitive flexibility performance is at lower ends (the bottom) of the y-axes. (A) demonstrates the frequency of CAP 2 moderated the relationship between Age and the Verbal Fluency Switching condition (total correct) as represented by the simple slopes of the frequency of CAP 2 (-1 SD, mean, and +1 SD). CAP 2 is characterized by co-activation among the L-FPN (lateral frontoparietal; central executive), M-FPN (medial frontoparietal; default), limbic and somatomotor nodes. (B) demonstrates the frequency of CAP 3 moderated the relationship

between Age and the Color-Word Interference Test (completion time) as represented by the simple slopes of the frequency of CAP 3 (-1 SD, mean, and +1 SD). CAP 3 is characterized by co-activation among the dorsal attention network (DAN), visual, and a few M-FPN nodes. (C) demonstrates the frequency of CAP 5 moderated the relationship between Age and the Color-Word Interference Test (completion time) as represented by the simple slopes of the frequency of CAP 5 (-1 SD, mean, and +1 SD). CAP 5 is characterized by co-activation among the L-FPN, M-FPN, M-CIN (midcingulo-insular; salience), and somatomotor node. In A, B, and C, children with more frequently occurring CAP states had greater cognitive flexibility, whereas older adults with less frequently occurring CAP states had greater cognitive flexibility relative to their age groups. Young adults exhibited optimal cognitive flexibility regardless of how frequently the CAP states occurred.

**Supplementary Table 1.** Summary of the hierarchical regression analysis of age and the brain dynamic metrics predicting cognitive flexibility. To simplify the presentation, we present only the significant variables of interest and not the covariates.

| Step                                             | Variable         | $\beta$ | <i>b</i> | <i>SE</i> | <i>t</i> | <i>p</i>  |
|--------------------------------------------------|------------------|---------|----------|-----------|----------|-----------|
| <b>Dwell time (DT) CAP 5 and age predict TMT</b> |                  |         |          |           |          |           |
| <b>1</b>                                         | age              | -.07    | -0.13    | 0.09      | -1.44    | .141      |
|                                                  | age <sup>2</sup> | .35     | 0.03     | 0.004     | 7.82     | < .001*** |
| <b>2</b>                                         | DT CAP 5         | .04     | 2.49     | 2.31      | 1.08     | .281      |
| <b>3</b>                                         | DT CAP 5 *       |         |          |           |          |           |
|                                                  | Age              | -.018   | -0.05    | 0.12      | -0.40    | .690      |
|                                                  | DT CAP 5 *       |         |          |           |          |           |
|                                                  | Age <sup>2</sup> | .20     | 0.02     | 0.01      | 3.13     | .002**    |
|                                                  | (Constant)       | -.003   | 63.12    | 7.27      | 8.69     | < .001*** |
| <b>Transitions and age predict TMT</b>           |                  |         |          |           |          |           |
| <b>1</b>                                         | age              | -.07    | -0.13    | 0.09      | -1.44    | .141      |

|   |                  |       |        |        |       |           |
|---|------------------|-------|--------|--------|-------|-----------|
|   | age <sup>2</sup> | .35   | 0.03   | 0.004  | 7.82  | < .001*** |
| 2 | Transitions      | .04   | 0.15   | 0.16   | 0.95  | .345      |
|   | Transitions*     |       |        |        |       |           |
| 3 | Age              | .07   | 0.1    | 0.01   | 1.52  | .128      |
|   | Transitions *    |       |        |        |       |           |
|   | Age <sup>2</sup> | -.18  | -0.001 | 0.0004 | -2.80 | .005**    |
|   | (Constant)       | -.002 | 63.30  | 7.29   | 8.68  | < .001*** |

---

**Transitions and age predict CWIT completion time**

---

|   |                  |      |        |         |       |           |
|---|------------------|------|--------|---------|-------|-----------|
| 1 | age              | -.28 | -0.24  | 0.04    | -5.80 | < .001*** |
|   | age <sup>2</sup> | .43  | 0.02   | 0.002   | 9.47  | < .001*** |
| 2 | Transitions      | .01  | -0.02  | 0.07    | -0.25 | .800      |
|   | Transitions*     |      |        |         |       |           |
| 3 | Age              | .08  | 0.01   | 0.004   | 1.84  | .067      |
|   | Transitions *    |      |        |         |       |           |
|   | Age <sup>2</sup> | -.17 | -0.001 | < 0.001 | -2.74 | .006**    |
|   | (Constant)       | .01  | 47.47  | 3.32    | 14.28 | < .001*** |

---

**DT CAP 1 and age predict CWIT total errors**

---

|   |                  |      |        |         |       |           |
|---|------------------|------|--------|---------|-------|-----------|
| 1 | age              | -.25 | -0.03  | 0.01    | -5.10 | < .001*** |
|   | age <sup>2</sup> | .28  | 0.002  | < 0.001 | 6.08  | < .001*** |
| 2 | DT CAP 1         | .02  | 0.05   | 0.13    | 0.40  | .690      |
| 3 | DT CAP 1* Age    | .05  | 0.01   | 0.01    | 1.12  | .263      |
|   | DT CAP 1 *       |      |        |         |       |           |
|   | Age <sup>2</sup> | -.17 | -0.001 | < 0.001 | -2.54 | .011*     |
|   | (Constant)       | .002 | 1.06   | 0.43    | 2.47  | .014*     |

---

**DT CAP 4 and age predict CWIT completion time**

---

|   |                  |      |       |       |       |           |
|---|------------------|------|-------|-------|-------|-----------|
| 1 | age              | -.28 | -0.24 | 0.04  | -5.80 | < .001*** |
|   | age <sup>2</sup> | .43  | 0.02  | 0.002 | 9.47  | < .001*** |
| 2 | DT CAP 4         | -.01 | -0.17 | 0.96  | -0.18 | 0.860     |
| 3 | DT CAP 4* Age    | -.15 | -0.17 | 0.06  | -2.97 | .003**    |
|   | DT CAP 4 *       |      |       |       |       |           |
|   | Age <sup>2</sup> | .16  | 0.01  | 0.003 | 2.39  | .017*     |
|   | (Constant)       | .01  | 47.45 | 3.31  | 14.34 | < .001*** |

---

| <b>DT CAP 2 and age predict TMT</b> |                  |       |       |       |       |           |
|-------------------------------------|------------------|-------|-------|-------|-------|-----------|
| <b>1</b>                            | age              | -.07  | -0.13 | 0.09  | -1.44 | .141      |
|                                     | age <sup>2</sup> | .35   | 0.03  | 0.004 | 7.82  | < .001*** |
| <b>2</b>                            | DT CAP 2         | -.04  | -2.32 | 2.32  | -1.00 | .318      |
| <b>3</b>                            | DT CAP 2 *       |       |       |       |       |           |
|                                     | Age              | -.04  | -0.10 | 0.13  | -0.78 | .436      |
|                                     | DT CAP 2 *       |       |       |       |       |           |
|                                     | Age <sup>2</sup> | .17   | 0.02  | 0.01  | 2.54  | .011*     |
|                                     | (Constant)       | -.001 | 62.81 | 7.31  | 8.60  | < .001*** |

| <b>DT CAP 3 and age predict TMT</b> |                  |       |       |       |       |           |
|-------------------------------------|------------------|-------|-------|-------|-------|-----------|
| <b>1</b>                            | age              | -.07  | -0.13 | 0.09  | -1.44 | .141      |
|                                     | age <sup>2</sup> | .35   | 0.03  | 0.004 | 7.82  | < .001*** |
| <b>2</b>                            | DT CAP 3         | .03   | 1.62  | 2.54  | 0.64  | .525      |
| <b>3</b>                            | DT CAP 3 *       |       |       |       |       |           |
|                                     | Age              | -.03  | -0.10 | 0.14  | -0.71 | .476      |
|                                     | DT CAP 3 *       |       |       |       |       |           |
|                                     | Age <sup>2</sup> | .15   | 0.02  | 0.01  | 2.22  | .027*     |
|                                     | (Constant)       | -.001 | 62.60 | 7.29  | 8.58  | < .001*** |

| <b>F CAP 5 and age predict TMT</b> |                            |       |       |       |       |           |
|------------------------------------|----------------------------|-------|-------|-------|-------|-----------|
| <b>1</b>                           | age                        | -.07  | -0.13 | 0.09  | -1.44 | .141      |
|                                    | age <sup>2</sup>           | .35   | 0.03  | 0.004 | 7.82  | < .001*** |
| <b>2</b>                           | F CAP 5                    | .05   | 49.64 | 40.20 | 1.24  | .217      |
| <b>3</b>                           | F CAP 5 * Age              | -.02  | -1.00 | 2.22  | -0.45 | .652      |
|                                    | F CAP 5 * Age <sup>2</sup> | .15   | 0.26  | 0.11  | 2.30  | .022*     |
|                                    | (Constant)                 | -.003 | 61.79 | 7.27  | 8.50  | < .001    |

| <b>DT CAP 2 and age predict VF</b> |                  |      |        |         |       |           |
|------------------------------------|------------------|------|--------|---------|-------|-----------|
| <b>1</b>                           | age              | .39  | 0.06   | 0.01    | 8.70  | < .001*** |
|                                    | age <sup>2</sup> | -.41 | -0.003 | < 0.001 | -9.68 | < .001*** |
| <b>2</b>                           | DT CAP 2         | .15  | 0.15   | 0.18    | 0.83  | .408      |
| <b>3</b>                           | DT CAP 1 *       |      |        |         |       |           |
|                                    | Age              | .03  | 0.01   | 0.01    | 0.81  | .420      |

| DT CAP 2 *                 |                            |         |        |       |       |           |
|----------------------------|----------------------------|---------|--------|-------|-------|-----------|
|                            | Age <sup>2</sup>           | -0.16   | -0.001 | 0.001 | -2.52 | .012*     |
|                            | (Constant)                 | -0.01   | 13.47  | 0.57  | 23.70 | < .001*** |
| F CAP 3 and age predict VF |                            |         |        |       |       |           |
| <b>1</b>                   | age                        | .39     | 0.06   | 0.01  | 8.70  | < .001*** |
|                            | age <sup>2</sup>           | -.41    | -3.10  | 1.40  | -2.21 | .028*     |
| <b>2</b>                   | F CAP 3                    | < 0.001 | 0.03   | 3.09  | 0.01  | .993      |
| <b>3</b>                   | F CAP 3 * Age              | -.05    | -0.20  | 0.18  | -1.14 | .253      |
|                            | F CAP 3 * Age <sup>2</sup> | .13     | 0.02   | 0.01  | 1.98  | .049      |
|                            | (Constant)                 | -.005   | 13.63  | 0.57  | 23.89 | < .001*** |

\*  $p < .05$

\*\*  $p < .01$

\*\*\*  $p < .001$

Notes:  $P$ -values are Bonferroni corrected. TMT, trail making test; CWIT, color-word interference test; VF, verbal fluency.

### Supplementary Table 2

| ROI Number | ROI                     |
|------------|-------------------------|
| 1          | SalVentAttn_ParOper_1   |
| 2          | SalVentAttn_ParOper_2   |
| 3          | SalVentAttn_ParOper_3   |
| 4          | SalVentAttn_ParOper_4   |
| 5          | SalVentAttn_TempOcc_1   |
| 6          | SalVentAttn_FrOperIns_1 |
| 7          | SalVentAttn_FrOperIns_2 |
| 8          | SalVentAttn_FrOperIns_3 |
| 9          | SalVentAttn_FrOperIns_4 |

|    |                          |
|----|--------------------------|
| 10 | SalVentAttn_FrOperIns_5  |
| 11 | SalVentAttn_FrOperIns_6  |
| 12 | SalVentAttn_FrOperIns_7  |
| 13 | SalVentAttn_FrOperIns_8  |
| 14 | SalVentAttn_FrOperIns_9  |
| 15 | SalVentAttn_PFCI_1       |
| 16 | SalVentAttn_Med_1        |
| 17 | SalVentAttn_Med_2        |
| 18 | SalVentAttn_Med_3        |
| 19 | SalVentAttn_Med_4        |
| 20 | SalVentAttn_Med_5        |
| 21 | SalVentAttn_Med_6        |
| 22 | SalVentAttn_Med_7        |
| 23 | SalVentAttn_TempOccPar_1 |
| 24 | SalVentAttn_TempOccPar_2 |
| 25 | SalVentAttn_TempOccPar_3 |
| 26 | SalVentAttn_TempOccPar_4 |
| 27 | SalVentAttn_TempOccPar_5 |
| 28 | SalVentAttn_TempOccPar_6 |
| 29 | SalVentAttn_TempOccPar_7 |
| 30 | SalVentAttn_PrC_1        |
| 31 | SalVentAttn_FrOperIns_1  |
| 32 | SalVentAttn_FrOperIns_2  |
| 33 | SalVentAttn_FrOperIns_3  |
| 34 | SalVentAttn_FrOperIns_4  |
| 35 | SalVentAttn_FrOperIns_5  |
| 36 | SalVentAttn_FrOperIns_6  |

|    |                         |
|----|-------------------------|
| 37 | SalVentAttn_FrOperIns_7 |
| 38 | SalVentAttn_FrOperIns_8 |
| 39 | SalVentAttn_PFCI_1      |
| 40 | SalVentAttn_Med_1       |
| 41 | SalVentAttn_Med_2       |
| 42 | SalVentAttn_Med_3       |
| 43 | SalVentAttn_Med_4       |
| 44 | SalVentAttn_Med_5       |
| 45 | SalVentAttn_Med_6       |
| 46 | SalVentAttn_Med_7       |
| 47 | SalVentAttn_Med_8       |
| 48 | Cont_Par_1              |
| 49 | Cont_Par_2              |
| 50 | Cont_Par_3              |
| 51 | Cont_Par_4              |
| 52 | Cont_Par_5              |
| 53 | Cont_Par_6              |
| 54 | Cont_Temp_1             |
| 55 | Cont_OFC_1              |
| 56 | Cont_PFCI_1             |
| 57 | Cont_PFCI_2             |
| 58 | Cont_PFCI_3             |
| 59 | Cont_PFCI_4             |
| 60 | Cont_PFCI_5             |
| 61 | Cont_PFCI_6             |
| 62 | Cont_PFCI_7             |
| 63 | Cont_PFCI_8             |

|    |              |
|----|--------------|
| 64 | Cont_PFCv_1  |
| 65 | Cont_pCun_1  |
| 66 | Cont_pCun_2  |
| 67 | Cont_Cing_1  |
| 68 | Cont_Cing_2  |
| 69 | Cont_PFCmp_1 |
| 70 | Cont_Par_1   |
| 71 | Cont_Par_2   |
| 72 | Cont_Par_3   |
| 73 | Cont_Par_4   |
| 74 | Cont_Par_5   |
| 75 | Cont_Par_6   |
| 76 | Cont_Temp_1  |
| 77 | Cont_Temp_2  |
| 78 | Cont_PFCv_1  |
| 79 | Cont_PFCI_1  |
| 80 | Cont_PFCI_2  |
| 81 | Cont_PFCI_3  |
| 82 | Cont_PFCI_4  |
| 83 | Cont_PFCI_5  |
| 84 | Cont_PFCI_6  |
| 85 | Cont_PFCI_7  |
| 86 | Cont_PFCI_8  |
| 87 | Cont_PFCI_9  |
| 88 | Cont_PFCI_10 |
| 89 | Cont_PFCI_11 |
| 90 | Cont_PFCI_12 |



|     |                 |
|-----|-----------------|
| 91  | Cont_PFCI_13    |
| 92  | Cont_PFCI_14    |
| 93  | Cont_PFCI_15    |
| 94  | Cont_pCun_1     |
| 95  | Cont_pCun_2     |
| 96  | Cont_Cing_1     |
| 97  | Cont_Cing_2     |
| 98  | Cont_PFCmp_1    |
| 99  | Cont_PFCmp_2    |
| 100 | Default_Temp_1  |
| 101 | Default_Temp_2  |
| 102 | Default_Temp_3  |
| 103 | Default_Temp_4  |
| 104 | Default_Temp_5  |
| 105 | Default_Temp_6  |
| 106 | Default_Temp_7  |
| 107 | Default_Temp_8  |
| 108 | Default_Temp_9  |
| 109 | Default_Temp_10 |
| 110 | Default_Par_1   |
| 111 | Default_Par_2   |
| 112 | Default_Par_3   |
| 113 | Default_Par_4   |
| 114 | Default_Par_5   |
| 115 | Default_Par_6   |
| 116 | Default_Par_7   |
| 117 | Default_PFC_1   |

|     |                   |
|-----|-------------------|
| 118 | Default_PFC_2     |
| 119 | Default_PFC_3     |
| 120 | Default_PFC_4     |
| 121 | Default_PFC_5     |
| 122 | Default_PFC_6     |
| 123 | Default_PFC_7     |
| 124 | Default_PFC_8     |
| 125 | Default_PFC_9     |
| 126 | Default_PFC_10    |
| 127 | Default_PFC_11    |
| 128 | Default_PFC_12    |
| 129 | Default_PFC_13    |
| 130 | Default_PFC_14    |
| 131 | Default_PFC_15    |
| 132 | Default_PFC_16    |
| 133 | Default_PFC_17    |
| 134 | Default_PFC_18    |
| 135 | Default_PFC_19    |
| 136 | Default_PFC_20    |
| 137 | Default_PFC_21    |
| 138 | Default_PFC_22    |
| 139 | Default_PFC_23    |
| 140 | Default_PFC_24    |
| 141 | Default_pCunPCC_1 |
| 142 | Default_pCunPCC_2 |
| 143 | Default_pCunPCC_3 |
| 144 | Default_pCunPCC_4 |

|     |                    |
|-----|--------------------|
| 145 | Default_pCunPCC_5  |
| 146 | Default_pCunPCC_6  |
| 147 | Default_pCunPCC_7  |
| 148 | Default_pCunPCC_8  |
| 149 | Default_pCunPCC_9  |
| 150 | Default_pCunPCC_10 |
| 151 | Default_pCunPCC_11 |
| 152 | Default_Par_1      |
| 153 | Default_Par_2      |
| 154 | Default_Par_3      |
| 155 | Default_Par_4      |
| 156 | Default_Par_5      |
| 157 | Default_Temp_1     |
| 158 | Default_Temp_2     |
| 159 | Default_Temp_3     |
| 160 | Default_Temp_4     |
| 161 | Default_Temp_5     |
| 162 | Default_Temp_6     |
| 163 | Default_Temp_7     |
| 164 | Default_Temp_8     |
| 165 | Default_PFCv_1     |
| 166 | Default_PFCv_2     |
| 167 | Default_PFCv_3     |
| 168 | Default_PFCv_4     |
| 169 | Default_PFCdPFCm_1 |
| 170 | Default_PFCdPFCm_2 |
| 171 | Default_PFCdPFCm_3 |

|     |                     |
|-----|---------------------|
| 172 | Default_PFCdPFCm_4  |
| 173 | Default_PFCdPFCm_5  |
| 174 | Default_PFCdPFCm_6  |
| 175 | Default_PFCdPFCm_7  |
| 176 | Default_PFCdPFCm_8  |
| 177 | Default_PFCdPFCm_9  |
| 178 | Default_PFCdPFCm_10 |
| 179 | Default_PFCdPFCm_11 |
| 180 | Default_PFCdPFCm_12 |
| 181 | Default_PFCdPFCm_13 |
| 182 | Default_pCunPCC_1   |
| 183 | Default_pCunPCC_2   |
| 184 | Default_pCunPCC_3   |
| 185 | Default_pCunPCC_4   |
| 186 | Default_pCunPCC_5   |
| 187 | Default_pCunPCC_6   |
| 188 | Default_pCunPCC_7   |
| 189 | Default_pCunPCC_8   |
| 190 | Default_pCunPCC_9   |

**Supplementary Table 3**

| ROI Number | ROI         |
|------------|-------------|
| 1          | Cont_Cing_1 |
| 2          | Cont_Cing_1 |
| 3          | Cont_Cing_2 |
| 4          | Cont_Cing_2 |

|    |              |
|----|--------------|
| 5  | Cont_OFC_1   |
| 6  | Cont_Par_1   |
| 7  | Cont_Par_1   |
| 8  | Cont_Par_2   |
| 9  | Cont_Par_2   |
| 10 | Cont_Par_3   |
| 11 | Cont_Par_3   |
| 12 | Cont_Par_4   |
| 13 | Cont_Par_4   |
| 14 | Cont_Par_5   |
| 15 | Cont_Par_5   |
| 16 | Cont_Par_6   |
| 17 | Cont_Par_6   |
| 18 | Cont_pCun_1  |
| 19 | Cont_pCun_1  |
| 20 | Cont_pCun_2  |
| 21 | Cont_pCun_2  |
| 22 | Cont_PFCI_1  |
| 23 | Cont_PFCI_1  |
| 24 | Cont_PFCI_10 |
| 25 | Cont_PFCI_11 |
| 26 | Cont_PFCI_12 |
| 27 | Cont_PFCI_13 |
| 28 | Cont_PFCI_14 |
| 29 | Cont_PFCI_15 |
| 30 | Cont_PFCI_2  |
| 31 | Cont_PFCI_2  |

|    |               |
|----|---------------|
| 32 | Cont_PFCI_3   |
| 33 | Cont_PFCI_3   |
| 34 | Cont_PFCI_4   |
| 35 | Cont_PFCI_4   |
| 36 | Cont_PFCI_5   |
| 37 | Cont_PFCI_5   |
| 38 | Cont_PFCI_6   |
| 39 | Cont_PFCI_6   |
| 40 | Cont_PFCI_7   |
| 41 | Cont_PFCI_7   |
| 42 | Cont_PFCI_8   |
| 43 | Cont_PFCI_8   |
| 44 | Cont_PFCI_9   |
| 45 | Cont_PFCmp_1  |
| 46 | Cont_PFCmp_1  |
| 47 | Cont_PFCmp_2  |
| 48 | Cont_PFCv_1   |
| 49 | Cont_PFCv_1   |
| 50 | Cont_Temp_1   |
| 51 | Cont_Temp_1   |
| 52 | Cont_Temp_2   |
| 53 | Default_Par_1 |
| 54 | Default_Par_1 |
| 55 | Default_Par_2 |
| 56 | Default_Par_2 |
| 57 | Default_Par_3 |
| 58 | Default_Par_3 |

|    |                    |
|----|--------------------|
| 59 | Default_Par_4      |
| 60 | Default_Par_4      |
| 61 | Default_Par_5      |
| 62 | Default_Par_5      |
| 63 | Default_Par_6      |
| 64 | Default_Par_7      |
| 65 | Default_pCunPCC_1  |
| 66 | Default_pCunPCC_1  |
| 67 | Default_pCunPCC_10 |
| 68 | Default_pCunPCC_11 |
| 69 | Default_pCunPCC_2  |
| 70 | Default_pCunPCC_2  |
| 71 | Default_pCunPCC_3  |
| 72 | Default_pCunPCC_3  |
| 73 | Default_pCunPCC_4  |
| 74 | Default_pCunPCC_4  |
| 75 | Default_pCunPCC_5  |
| 76 | Default_pCunPCC_5  |
| 77 | Default_pCunPCC_6  |
| 78 | Default_pCunPCC_6  |
| 79 | Default_pCunPCC_7  |
| 80 | Default_pCunPCC_7  |
| 81 | Default_pCunPCC_8  |
| 82 | Default_pCunPCC_8  |
| 83 | Default_pCunPCC_9  |
| 84 | Default_pCunPCC_9  |
| 85 | Default_PFC_1      |

|     |                     |
|-----|---------------------|
| 86  | Default_PFC_10      |
| 87  | Default_PFC_11      |
| 88  | Default_PFC_12      |
| 89  | Default_PFC_13      |
| 90  | Default_PFC_14      |
| 91  | Default_PFC_15      |
| 92  | Default_PFC_16      |
| 93  | Default_PFC_17      |
| 94  | Default_PFC_18      |
| 95  | Default_PFC_19      |
| 96  | Default_PFC_2       |
| 97  | Default_PFC_20      |
| 98  | Default_PFC_21      |
| 99  | Default_PFC_22      |
| 100 | Default_PFC_23      |
| 101 | Default_PFC_24      |
| 102 | Default_PFC_3       |
| 103 | Default_PFC_4       |
| 104 | Default_PFC_5       |
| 105 | Default_PFC_6       |
| 106 | Default_PFC_7       |
| 107 | Default_PFC_8       |
| 108 | Default_PFC_9       |
| 109 | Default_PFCdPFCm_1  |
| 110 | Default_PFCdPFCm_10 |
| 111 | Default_PFCdPFCm_11 |
| 112 | Default_PFCdPFCm_12 |



|     |                     |
|-----|---------------------|
| 113 | Default_PFCdPFCm_13 |
| 114 | Default_PFCdPFCm_2  |
| 115 | Default_PFCdPFCm_3  |
| 116 | Default_PFCdPFCm_4  |
| 117 | Default_PFCdPFCm_5  |
| 118 | Default_PFCdPFCm_6  |
| 119 | Default_PFCdPFCm_7  |
| 120 | Default_PFCdPFCm_8  |
| 121 | Default_PFCdPFCm_9  |
| 122 | Default_PFCv_1      |
| 123 | Default_PFCv_2      |
| 124 | Default_PFCv_3      |
| 125 | Default_PFCv_4      |
| 126 | Default_Temp_1      |
| 127 | Default_Temp_1      |
| 128 | Default_Temp_10     |
| 129 | Default_Temp_2      |
| 130 | Default_Temp_2      |
| 131 | Default_Temp_3      |
| 132 | Default_Temp_3      |
| 133 | Default_Temp_4      |
| 134 | Default_Temp_4      |
| 135 | Default_Temp_5      |
| 136 | Default_Temp_5      |
| 137 | Default_Temp_6      |
| 138 | Default_Temp_6      |
| 139 | Default_Temp_7      |

|     |                  |
|-----|------------------|
| 140 | Default_Temp_7   |
| 141 | Default_Temp_8   |
| 142 | Default_Temp_8   |
| 143 | Default_Temp_9   |
| 144 | DorsAttn_FEF_1   |
| 145 | DorsAttn_FEF_1   |
| 146 | DorsAttn_FEF_2   |
| 147 | DorsAttn_FEF_2   |
| 148 | DorsAttn_FEF_3   |
| 149 | DorsAttn_FEF_3   |
| 150 | DorsAttn_FEF_4   |
| 151 | DorsAttn_Post_1  |
| 152 | DorsAttn_Post_1  |
| 153 | DorsAttn_Post_10 |
| 154 | DorsAttn_Post_10 |
| 155 | DorsAttn_Post_11 |
| 156 | DorsAttn_Post_11 |
| 157 | DorsAttn_Post_12 |
| 158 | DorsAttn_Post_12 |
| 159 | DorsAttn_Post_13 |
| 160 | DorsAttn_Post_13 |
| 161 | DorsAttn_Post_14 |
| 162 | DorsAttn_Post_14 |
| 163 | DorsAttn_Post_15 |
| 164 | DorsAttn_Post_15 |
| 165 | DorsAttn_Post_16 |
| 166 | DorsAttn_Post_16 |

|     |                  |
|-----|------------------|
| 167 | DorsAttn_Post_17 |
| 168 | DorsAttn_Post_17 |
| 169 | DorsAttn_Post_18 |
| 170 | DorsAttn_Post_19 |
| 171 | DorsAttn_Post_2  |
| 172 | DorsAttn_Post_2  |
| 173 | DorsAttn_Post_3  |
| 174 | DorsAttn_Post_3  |
| 175 | DorsAttn_Post_4  |
| 176 | DorsAttn_Post_4  |
| 177 | DorsAttn_Post_5  |
| 178 | DorsAttn_Post_5  |
| 179 | DorsAttn_Post_6  |
| 180 | DorsAttn_Post_6  |
| 181 | DorsAttn_Post_7  |
| 182 | DorsAttn_Post_7  |
| 183 | DorsAttn_Post_8  |
| 184 | DorsAttn_Post_8  |
| 185 | DorsAttn_Post_9  |
| 186 | DorsAttn_Post_9  |
| 187 | DorsAttn_PrCv_1  |
| 188 | DorsAttn_PrCv_1  |
| 189 | DorsAttn_PrCv_2  |
| 190 | Limbic_OFC_1     |
| 191 | Limbic_OFC_1     |
| 192 | Limbic_OFC_2     |
| 193 | Limbic_OFC_2     |

|     |                         |
|-----|-------------------------|
| 194 | Limbic_OFC_3            |
| 195 | Limbic_OFC_3            |
| 196 | Limbic_OFC_4            |
| 197 | Limbic_OFC_4            |
| 198 | Limbic_OFC_5            |
| 199 | Limbic_OFC_5            |
| 200 | Limbic_OFC_6            |
| 201 | Limbic_TempPole_1       |
| 202 | Limbic_TempPole_1       |
| 203 | Limbic_TempPole_2       |
| 204 | Limbic_TempPole_2       |
| 205 | Limbic_TempPole_3       |
| 206 | Limbic_TempPole_3       |
| 207 | Limbic_TempPole_4       |
| 208 | Limbic_TempPole_4       |
| 209 | Limbic_TempPole_5       |
| 210 | Limbic_TempPole_5       |
| 211 | Limbic_TempPole_6       |
| 212 | Limbic_TempPole_6       |
| 213 | Limbic_TempPole_7       |
| 214 | Limbic_TempPole_7       |
| 215 | Limbic_TempPole_8       |
| 216 | SalVentAttn_FrOperIns_1 |
| 217 | SalVentAttn_FrOperIns_1 |
| 218 | SalVentAttn_FrOperIns_2 |
| 219 | SalVentAttn_FrOperIns_2 |
| 220 | SalVentAttn_FrOperIns_3 |

|     |                         |
|-----|-------------------------|
| 221 | SalVentAttn_FrOperIns_3 |
| 222 | SalVentAttn_FrOperIns_4 |
| 223 | SalVentAttn_FrOperIns_4 |
| 224 | SalVentAttn_FrOperIns_5 |
| 225 | SalVentAttn_FrOperIns_5 |
| 226 | SalVentAttn_FrOperIns_6 |
| 227 | SalVentAttn_FrOperIns_6 |
| 228 | SalVentAttn_FrOperIns_7 |
| 229 | SalVentAttn_FrOperIns_7 |
| 230 | SalVentAttn_FrOperIns_8 |
| 231 | SalVentAttn_FrOperIns_8 |
| 232 | SalVentAttn_FrOperIns_9 |
| 233 | SalVentAttn_Med_1       |
| 234 | SalVentAttn_Med_1       |
| 235 | SalVentAttn_Med_2       |
| 236 | SalVentAttn_Med_2       |
| 237 | SalVentAttn_Med_3       |
| 238 | SalVentAttn_Med_3       |
| 239 | SalVentAttn_Med_4       |
| 240 | SalVentAttn_Med_4       |
| 241 | SalVentAttn_Med_5       |
| 242 | SalVentAttn_Med_5       |
| 243 | SalVentAttn_Med_6       |
| 244 | SalVentAttn_Med_6       |
| 245 | SalVentAttn_Med_7       |
| 246 | SalVentAttn_Med_7       |
| 247 | SalVentAttn_Med_8       |

|     |                          |
|-----|--------------------------|
| 248 | SalVentAttn_ParOper_1    |
| 249 | SalVentAttn_ParOper_2    |
| 250 | SalVentAttn_ParOper_3    |
| 251 | SalVentAttn_ParOper_4    |
| 252 | SalVentAttn_PFCI_1       |
| 253 | SalVentAttn_PFCI_1       |
| 254 | SalVentAttn_PrC_1        |
| 255 | SalVentAttn_TempOcc_1    |
| 256 | SalVentAttn_TempOccPar_1 |
| 257 | SalVentAttn_TempOccPar_2 |
| 258 | SalVentAttn_TempOccPar_3 |
| 259 | SalVentAttn_TempOccPar_4 |
| 260 | SalVentAttn_TempOccPar_5 |
| 261 | SalVentAttn_TempOccPar_6 |
| 262 | SalVentAttn_TempOccPar_7 |
| 263 | SomMot_1                 |
| 264 | SomMot_1                 |
| 265 | SomMot_10                |
| 266 | SomMot_10                |
| 267 | SomMot_11                |
| 268 | SomMot_11                |
| 269 | SomMot_12                |
| 270 | SomMot_12                |
| 271 | SomMot_13                |
| 272 | SomMot_13                |
| 273 | SomMot_14                |
| 274 | SomMot_14                |

|     |           |
|-----|-----------|
| 275 | SomMot_15 |
| 276 | SomMot_15 |
| 277 | SomMot_16 |
| 278 | SomMot_16 |
| 279 | SomMot_17 |
| 280 | SomMot_17 |
| 281 | SomMot_18 |
| 282 | SomMot_18 |
| 283 | SomMot_19 |
| 284 | SomMot_19 |
| 285 | SomMot_2  |
| 286 | SomMot_2  |
| 287 | SomMot_20 |
| 288 | SomMot_20 |
| 289 | SomMot_21 |
| 290 | SomMot_21 |
| 291 | SomMot_22 |
| 292 | SomMot_22 |
| 293 | SomMot_23 |
| 294 | SomMot_23 |
| 295 | SomMot_24 |
| 296 | SomMot_24 |
| 297 | SomMot_25 |
| 298 | SomMot_25 |
| 299 | SomMot_26 |
| 300 | SomMot_26 |
| 301 | SomMot_27 |

|     |           |
|-----|-----------|
| 302 | SomMot_27 |
| 303 | SomMot_28 |
| 304 | SomMot_28 |
| 305 | SomMot_29 |
| 306 | SomMot_29 |
| 307 | SomMot_3  |
| 308 | SomMot_3  |
| 309 | SomMot_30 |
| 310 | SomMot_30 |
| 311 | SomMot_31 |
| 312 | SomMot_31 |
| 313 | SomMot_32 |
| 314 | SomMot_32 |
| 315 | SomMot_33 |
| 316 | SomMot_33 |
| 317 | SomMot_34 |
| 318 | SomMot_34 |
| 319 | SomMot_35 |
| 320 | SomMot_35 |
| 321 | SomMot_36 |
| 322 | SomMot_36 |
| 323 | SomMot_37 |
| 324 | SomMot_37 |
| 325 | SomMot_38 |
| 326 | SomMot_39 |
| 327 | SomMot_4  |
| 328 | SomMot_4  |



|     |           |
|-----|-----------|
| 329 | SomMot_40 |
| 330 | SomMot_5  |
| 331 | SomMot_5  |
| 332 | SomMot_6  |
| 333 | SomMot_6  |
| 334 | SomMot_7  |
| 335 | SomMot_7  |
| 336 | SomMot_8  |
| 337 | SomMot_8  |
| 338 | SomMot_9  |
| 339 | SomMot_9  |
| 340 | Vis_1     |
| 341 | Vis_1     |
| 342 | Vis_10    |
| 343 | Vis_10    |
| 344 | Vis_11    |
| 345 | Vis_11    |
| 346 | Vis_12    |
| 347 | Vis_12    |
| 348 | Vis_13    |
| 349 | Vis_13    |
| 350 | Vis_14    |
| 351 | Vis_14    |
| 352 | Vis_15    |
| 353 | Vis_15    |
| 354 | Vis_16    |
| 355 | Vis_16    |

|     |        |
|-----|--------|
| 356 | Vis_17 |
| 357 | Vis_17 |
| 358 | Vis_18 |
| 359 | Vis_18 |
| 360 | Vis_19 |
| 361 | Vis_19 |
| 362 | Vis_2  |
| 363 | Vis_2  |
| 364 | Vis_20 |
| 365 | Vis_20 |
| 366 | Vis_21 |
| 367 | Vis_21 |
| 368 | Vis_22 |
| 369 | Vis_22 |
| 370 | Vis_23 |
| 371 | Vis_23 |
| 372 | Vis_24 |
| 373 | Vis_24 |
| 374 | Vis_25 |
| 375 | Vis_25 |
| 376 | Vis_26 |
| 377 | Vis_26 |
| 378 | Vis_27 |
| 379 | Vis_27 |
| 380 | Vis_28 |
| 381 | Vis_28 |
| 382 | Vis_29 |

|     |        |
|-----|--------|
| 383 | Vis_29 |
| 384 | Vis_3  |
| 385 | Vis_3  |
| 386 | Vis_30 |
| 387 | Vis_30 |
| 388 | Vis_31 |
| 389 | Vis_4  |
| 390 | Vis_4  |
| 391 | Vis_5  |
| 392 | Vis_5  |
| 393 | Vis_6  |
| 394 | Vis_6  |
| 395 | Vis_7  |
| 396 | Vis_7  |
| 397 | Vis_8  |
| 398 | Vis_8  |
| 399 | Vis_9  |
| 400 | Vis_9  |

**Supplementary Table 4.** Summary of the whole-brain moderation results. To simplify the presentation, we present only the significant variables of interest and not the covariates. Additionally step 1 of the models are omitted as the results of those steps can be seen in Supplementary Table 1.

| Step                                                              | Variable                    | <i>b</i> | <i>SE</i> | <i>t</i> | <i>p</i> |
|-------------------------------------------------------------------|-----------------------------|----------|-----------|----------|----------|
| <b>Dwell time (DT) CAP 1 and age predict CWIT completion time</b> |                             |          |           |          |          |
| 2                                                                 | DT CAP 1                    | 0.06     | 0.05      | 1.07     | .283     |
| 3                                                                 | DT CAP 1 * Age              | < 0.001  | < 0.001   | 2.50     | .013*    |
|                                                                   | DT CAP 1 * Age <sup>2</sup> | < 0.001  | < 0.001   |          | .448     |

|                                                                 |                             |         |         |       |        |
|-----------------------------------------------------------------|-----------------------------|---------|---------|-------|--------|
|                                                                 | (Constant)                  | 0.60    | 0.36    |       | .099   |
| <b>DT CAP 3 and age predict CWIT completion time</b>            |                             |         |         |       |        |
| 2                                                               | DT CAP 3                    | 0.04    | 0.05    | 0.85  | .397   |
| 3                                                               | DT CAP 3 * Age              | < 0.001 | < 0.001 | -2.13 | .034*  |
|                                                                 | DT CAP 3 * Age <sup>2</sup> | < 0.001 | < 0.001 | 0.64  | .520   |
|                                                                 | (Constant)                  | < 0.001 | < 0001  | 1.91  | .057   |
| <b>DT CAP 5 and age predict CWIT completion time</b>            |                             |         |         |       |        |
| 2                                                               | DT CAP 5                    | 0.02    | 0.05    | 0.47  | .641   |
| 3                                                               | DT CAP 5 * Age              | -0.01   | 0.003   | -2.70 | .007** |
|                                                                 | DT CAP 5 * Age <sup>2</sup> | < 0.001 | < 0.001 | 1.70  | .090   |
|                                                                 | (Constant)                  | 1.19    | 0.42    | 2.83  | .005** |
| <b>Frequency (F) CAP 1 and age predict CWIT completion time</b> |                             |         |         |       |        |
| 2                                                               | F CAP 1                     | 0.55    | 1.00    | 0.55  | .586   |
| 3                                                               | F CAP 1 * Age               | 0.17    | 0.05    | 3.15  | .002** |
|                                                                 | F CAP 1 * Age <sup>2</sup>  | -0.01   | 0.002   | -2.29 | .022*  |
|                                                                 | (Constant)                  | 0.29    | 0.36    | 0.80  | .422   |
| <b>F CAP 2 and age predict CWIT completion time</b>             |                             |         |         |       |        |
| 2                                                               | F CAP 2                     | -1.32   | 0.94    | -1.40 | .161   |
| 3                                                               | F CAP 2 * Age               | 0.11    | 0.05    | 2.18  | .029*  |
|                                                                 | F CAP 2 * Age <sup>2</sup>  | -0.003  | 0.003   | -1.04 | .301   |
|                                                                 | (Constant)                  | 0.95    | 0.30    | 3.19  | .002** |
| <b>F CAP 3 and age predict CWIT completion time</b>             |                             |         |         |       |        |
| 2                                                               | F CAP 3                     | 1.73    | 0.92    | 1.87  | .062   |
| 3                                                               | F CAP 3 * Age               | -0.16   | 0.05    | -3.14 | .002** |
|                                                                 | F CAP 3 * Age <sup>2</sup>  | 0.01    | 0.002   | 1.97  | .050   |
|                                                                 | (Constant)                  | 0.81    | 0.32    | 2.53  | .012*  |
| <b>F CAP 5 and age predict CWIT completion time</b>             |                             |         |         |       |        |
| 2                                                               | F CAP 5                     | 0.29    | 0.93    | 0.31  | .757   |

|                                    |                             |         |         |       |           |
|------------------------------------|-----------------------------|---------|---------|-------|-----------|
| 3                                  | F CAP 5 * Age               | -0.18   | 0.05    | -3.55 | < .001*** |
|                                    | F CAP 5 * Age <sup>2</sup>  | 0.01    | 0.002   | 1.89  | .059      |
|                                    | (Constant)                  | 1.06    | 0.33    | 3.22  | .001**    |
| <hr/>                              |                             |         |         |       |           |
| <b>DT CAP 2 and age predict VF</b> |                             |         |         |       |           |
| 2                                  | DT CAP 3                    | -0.01   | 0.05    | -0.21 | .833      |
| 3                                  | DT CAP 3 * Age              | -0.01   | 0.002   | -2.14 | .033*     |
|                                    | DT CAP 3 * Age <sup>2</sup> | < 0.001 | < 0.001 | 1.27  | .033*     |
|                                    | (Constant)                  | 0.22    | 0.32    | 0.69  | .491      |
| <hr/>                              |                             |         |         |       |           |
| <b>DT CAP 3 and age predict VF</b> |                             |         |         |       |           |
| 2                                  | DT CAP 5                    | 0.01    | 0.05    | 0.132 | .895      |
| 3                                  | DT CAP 5 * Age              | 0.01    | 0.003   | 2.65  | .008**    |
|                                    | DT CAP 5 * Age <sup>2</sup> | < 0.001 | < 0.001 | -2.15 | .032*     |
|                                    | (Constant)                  | -0.45   | 0.37    | -1.24 | .216      |
| <hr/>                              |                             |         |         |       |           |
| <b>DT CAP 5 and age predict VF</b> |                             |         |         |       |           |
| 2                                  | F CAP 1                     | 0.03    | 0.05    | 0.58  | .564      |
| 3                                  | F CAP 1 * Age               | 0.005   | 0.003   | 1.94  | .053      |
|                                    | F CAP 1 * Age <sup>2</sup>  | < 0.001 | < 0.001 | -2.34 | .020*     |
|                                    | (Constant)                  | -0.77   | 0.40    | -1.93 | .054      |
| <hr/>                              |                             |         |         |       |           |
| <b>F CAP 2 and age predict VF</b>  |                             |         |         |       |           |
| 2                                  | F CAP 2                     | -0.71   | 0.90    | -0.79 | .432      |
| 3                                  | F CAP 2 * Age               | -0.01   | 0.01    | -2.99 | .003**    |
|                                    | F CAP 2 * Age <sup>2</sup>  | 0.005   | 0.002   | 1.87  | .061      |
|                                    | (Constant)                  | 0.04    | 0.03    | 1.21  | .187      |

\*  $p < .05$

\*\*  $p < .01$

\*\*\*  $p < .001$

Note:  $P$ -values are Bonferroni corrected. CWIT, color-word interference test; VF, verbal fluency.

## References

Schaefer A, Kong R, Gordon EM, Laumann TO, Zuo X-N, Holmes AJ, Eickhoff SB, Yeo BTT. 2018. Local-Global Parcellation of the Human Cerebral Cortex from Intrinsic Functional Connectivity MRI. *Cereb Cortex*. 28:3095–3114.
